# Supplementary material for: Global systematic assessment of Indigenous participation and inclusion in water governance
Source: Research Square preprint supplement (doi:10.21203/rs.3.rs-5519486/v1), 2024-12-12
Supplement: Supplementary file 1 [file 9f4bdf8897301339725876ad.docx]

**Supplementary Material**

This supplementary material provides additional information on the literature search, screening, the decision-tree to support eligible studies, the flowchart process, the coding scheme, selected case studies and papers with evaluations, and those that considered Indigenous values, and a complete reference list for the 222 papers.

[DETAILED METHODS 2](#_Toc182823427)

[1) Definitions 2](#_Toc182823428)

[2) Literature Search 4](#_Toc182823429)

[3) Screening at Abstract and Title Level 4](#_Toc182823430)

[4) Kappa Test 5](#_Toc182823431)

[5) Eligibility at Full-text 5](#_Toc182823432)

[6) Final list of papers and studies and flowchart of process 7](#_Toc182823433)

[7) Coding Scheme 8](#_Toc182823434)

[ADDITIONAL RESULTS 11](#_Toc182823435)

[1) No. of journal articles and case studies 11](#_Toc182823436)

[2) Journal articles by year 12](#_Toc182823437)

[3) Case study scales by country/region and by scale 12](#_Toc182823438)

[4) Participation types by country/region 14](#_Toc182823439)

[5) Participation types by scale 16](#_Toc182823440)

[6) Themes by country/region 19](#_Toc182823441)

[7) Theme by scale 21](#_Toc182823442)

[8) Selected Case studies with evaluation 23](#_Toc182823443)

[9) Case studies where Indigenous values and knowledge were considered in water governance 24](#_Toc182823444)

[10) Complete Reference List 26](#_Toc182823445)

# DETAILED METHODS

## Definitions

**Water Governance**: There are several definitions for the term *water governance* (Tortajada, 2010). Building on the definition by Emanuel and Wilkins (2020), we define water governance here as the processes, principles, and institutions involved in decision-making about the use, management, conservation, and protection of water. For this review, we consider all real-world examples of decisions, laws, and policies related to water. Our focus is limited to freshwater systems, including both surface water and groundwater. Additionally, we cover issues related to water resources (such as lakes, rivers, and basins) and water services (including water supply and sanitation). However, this review does not encompass ocean water or coastal and marine governance.

**Indigenous peoples**: Defining Indigenous peoples can be challenging, as in certain contexts, Indigenous peoples are used interchangeably with ethnic minorities, or with local communities and tribes. For this review, we rely on the definition put forward by Jose Martinez Cobo, the United Nation’s Special Rapporteur of the Sub-Commission on Prevention of Discrimination and Protection of Minorities in 1986, where they define an indigenous person as “one who belongs to these indigenous populations through self-identification as indigenous and is recognized and accepted by these populations as one of its members”(Cobo, 1986).

**Participation**: Participation can be described as “a process where individuals, groups and organizations choose to take an active role in making decisions that affect them” (Reed, 2008), or simply “involvement in a process” (Carr, Blöschl and Loucks, 2012). We adopt a broad definition of participation and view it to mean involvement. Specifically, the review will look at how Indigenous peoples involve themselves or engage on issues around water governance, either while interfacing with or as a response to another external actor. This includes examples of Indigenous responses to state-driven policies such as political mobilization but excludes initiatives that are focused purely on Indigenous water governance and management without demonstrating how Indigenous peoples interface with any external actor. Within this framework of participation, we also review examples of the inclusion of Indigenous peoples in water governance processes. This means we will also look at how water laws, policies and/or frameworks have included Indigenous peoples, their values, their knowledge or their interests. Similar to participation, we analyze where, how, at what scale and what type of water laws, policies or frameworks include Indigenous peoples. This allows us to have a broader scope of the literature review by also reviewing water laws and policies, especially national water laws, and how they have provisions for including Indigenous peoples.

**Scale:** Scale can refer to a dimension such as temporal, spatial, hydrological or administration/political or levels within the dimension(Cash *et al.*, 2006; Moss and Newig, 2010). In our review, we define scale as levels of governance. For the geographies, individual countries were coded, but for presenting results, certain countries were consolidated into a distinct region for example South America. There were three isolated studies on Japan, Sweden and New Caledonia, consolidated into ‘Others’. Results were described for the following distinct geographies: Australia, Canada, United States, New Zealand, South America, Others and Transboundary. Transboundary case studies were treated as a distinct geography even though they were all along the United States- Canada border and were studied separately to avoid any dilution of results. Moreover, they were also treated as a scale.

Scale can refer to a dimension such as temporal, spatial, hydrological or administration/political or levels within the dimension(Cash *et al.*, 2006; Moss and Newig, 2010). In our review, we define scale as levels of governance, categorizing it into six codes: local, regional, provincial, federal, international, and transboundary.

Additional variables for which case studies were coded for, included whether the case studies were described, evaluated and if Indigenous values, norms or methods were considered in the participation process. These variables were coded as either Yes or No. This last category is separate from the studies where the participation type was coded as “Inclusion of Indigenous knowledge and values”, because there were several studies of other types of participation that may have considered Indigenous values and norms.

## Literature Search

The search was conducted on the 26th of November 2023, using Scopus and Web of Science research databases. To conduct the review, key search terms were employed using a Boolean search string to search English language articles that included these terms in their title, keywords, or abstracts. The search string employed on each of the databases is shown in Table 1 below:

Table 1: Boolean String used for Search Strategy

| ***Scopus*** | ( TITLE-ABS-KEY ( "indigenous" OR "first nations" OR "aboriginal" OR inuit OR maori ) AND TITLE-ABS-KEY ( "water polic*" OR "water strateg*" OR "water plan*" OR "water management" OR "water governance" OR "watershed plan*" OR "basin plan*" OR "water reform*" OR "water resources management" OR "Water law*" OR "water rights" ) ) AND ( LIMIT-TO ( DOCTYPE , "ar" ) ) AND ( LIMIT-TO ( LANGUAGE , "English" ) ) |
| --- | --- |
| ***Web of Sciences*** | (TS=("water polic*" OR "water strateg*" OR "water plan*" OR "water management" OR "water governance" OR "watershed plan*" OR "basin plan*" OR "water reform*" OR "water resources management" OR “Water law*” OR “water rights” )) AND TS=("indigenous " OR "first nations" OR "aboriginal" OR maori OR inuit ) and Article (Document Types) and English (Languages) |

The string strategy resulted in a total of 1229 results from Scopus and 587 results from Web of Science. After removing duplicates manually, the final list of unique results was 1341, which underwent a two-step screening process.

## Screening at Abstract and Title Level

The articles were screened at the title and abstract level, against specific inclusion criteria to be included for a full-text review. For the inclusion criteria, we defined water governance broadly to include water policies, water laws, water regulations, water management, water rights and water projects, as well as the governance of any freshwater body such as rivers, lakes, basins, and waterways. We also included articles on dams as long as there was a clear reference to water. Indigenous peoples could include Māori, First Nations, Inuit, Metis, Aboriginal, Ethnic minority, or a named group. If there was any doubt about whether the paper met these criteria, it was included for full-text review. Based on these inclusion criteria, we excluded a large number of articles that were focused on political movements, on topics not related to water governance, and topics that were not discussing Indigenous peoples, but referring to Indigenous species or plants.

## Kappa Test

Screening was primarily conducted by one author (L.K.), and a random subset of 10% of the journal articles (*n=360*) was checked between two secondary reviewers (A.M.C. and S.W.) at the title and abstract levels. There was an 88% agreement with A.M.C, with a kappa score of 0.75 while agreement with S.W. was 83%, with a kappa score of 0.67 without deliberation. Kappa scores were above 0.6 showing substantial agreement (Gisev, Bell and Chen, 2013). Following deliberation with S.W, the kappa score was further raised to 0.97.

## Eligibility at Full-text

Following the initial screening, a total of 523 articles were reviewed at the full-text level to gauge eligibility. For eligibility at the full text level, we included articles that were published in peer-reviewed journals; written in English; and provided a specific example of how Indigenous peoples participate in water governance while interfacing with another non-Indigenous actor (active participation) or provided a specific example of how non-Indigenous water laws and policies include or accommodate Indigenous peoples, their interests, values or knowledge systems (passive participation). We excluded articles that were review articles or introductions to special issues; and articles that were not published in journals, such as book chapters, trade journals, conference proceedings etc. Table 3 sets out the criteria for eligible papers.

| INCLUSION CRITERIA | ABSTRACT AND TITLE SCREENING | | FULL-TEXT ELIGIBILITY |
| --- | --- | --- | --- |
| IN ENGLISH | **X** | **X** | |
| EXPLICITLY DISCUSSING ISSUES OF OR RELATED TO WATER GOVERNANCE | **X** |  | |
| EXPLICITLY DISCUSSING INDIGENOUS PEOPLES OR THEIR KNOWLEDGE AND VALUES. | **X** |  | |
| PUBLISHED IN A JOURNAL ARTICLE |  | **X** | |
| SPECIFIC EXAMPLE OR CASE STUDY OF INDIGENOUS PARTICIPATION OR INCLUSION IN WATER GOVERNANCE |  | **X** | |
| EXAMPLE MUST BE REAL-LIFE |  | **X** | |
| EXAMPLE MUST DEMONSTRATE INDIGENOUS PEOPLES ENGAGING OR AN EXTERNAL ACTOR OR A RESPONSE |  | **X** | |

The eligibility criteria were developed through an iterative process to ensure that the final result of articles would provide meaningful insights. This is because a great deal of the literature we initially found discussed Indigenous peoples’ ontologies, beliefs and practices around water governance, Indigenous water governance frameworks, general water security challenges within Indigenous communities such as lack of access to clean drinking water, polluted waters, infringement, or rights,as well as recommendations for increasing participation. Whilst these are interesting and important topics, they were excluded from this review as they did not include any example or case study of Indigenous participation or inclusion in water governance. Lastly, as we specifically want to review water governance literature, and not other environmental governance literature where water is peripheral, we excluded articles that were focused on other environmental issues such as biodiversity, fisheries, arctic ice, marine, land management, natural resources, climate change, and general political governance. In order to ensure consistency, we developed a decision-tree to support selection of articles (Figure 1)

Does the paper discuss Indigenous Peoples or their laws, values, norms, beliefs and practices?

Yes

Does the paper discuss water, freshwater or a related water body?

Is there a specific example provided of how Indigenous peoples are participating or being included in decisions around water?

If the paper describes Indigenous peoples’ participation, are there two or more entities involved where one is Indigenous, and another is non-Indigenous?

Does the paper provide an example of how water laws, policies or frameworks include Indigenous peoples?

Does the example discuss Indigenous peoples' response, activism, or resistance?

Does the paper discuss Indigenous /tribal water rights?

Does the paper provide some details on the water rights cases and the cases are specifically on water

Does the paper discuss Indigenous-related topics, such as Indigenous knowledge, values, etc.?

Is there an example provided of how Indigenous interests/knowledge/values are being included or applied in water governance (such as in a water policy)?

Is the example provided an actual governance or policy example (as opposed to a theoretical

Exclude

Yes

No

Yes

No

Include

Yes

No

No

Yes

No

Include

Yes

Include

Yes

Exclude

No

Include

Yes

Exclude

No

No

Yes

Exclude

Include

Yes

Exclude

No

Exclude

No

Yes

No

Exclude

Figure 1: Decision Tree for eligibility

## Final list of papers and studies and flowchart of process

After reviewing the papers for eligibility, a total of 222 papers were included. Several of the journal articles referred to the same case study or participatory process, while in a few articles, there were multiple case studies or processes listed. As a result, unique case studies were identified and extracted. Certain case studies appeared to overlap and where possible, these case studies were consolidated to get a clear understanding of Indigenous engagement. This was particularly the case when dealing with journal articles that reviewed national laws and policies. Furthermore, we only included those examples where the laws were specific to the issue of water and where some description, no matter how minimal, was provided. We excluded general laws and instruments that were not specific to water, such as Australia’s *Native Title Act*, New Zealand’s *Resource Management Act*, the *UNDRIP*, or the *ILO* 169. Each of these legal instruments have been used extensively by Indigenous peoples to establish rights to water, but none of these laws are *specific* or unique to water. On the other hand, we included *Winter’s Doctrine* as it specifically deals with water allocations. This is because our aim was to understand how the water sector specifically includes or excludes with Indigenous peoples. Similarly, while extracting individual case studies, especially from journal articles dealing with Indigenous and tribal water rights, we focused on case studies with adequate description provided and where the rights deal with water rights specifically. In total, we extracted 182 unique case studies through an iterative process.

## Coding Scheme

Coding was done for both the papers and the extracted case studies. The variables used to code the papers are documented in  Table 4. Any insights or information not directly related to these variables was kept in an “other findings” column. There were some challenges while coding some of these journal articles, where there was not enough information around the process of Indigenous participation or inclusion making it difficult to determine the extent of participation.

Table 4: Variables used to code articles

| Variables used to code journal articles | Coding |
| --- | --- |
| 1. Reference (authors, year, title, and journal) | - |
| 1. Geographical area | Deductive |
| 1. Are Indigenous peoples the focus of the study? (Y/N) | Deductive |
| 1. What thematic focus or issue of water governance are Indigenous peoples engaging in? | Open code |
| 1. What case study or example is discussed? | - |
| 1. How are Indigenous peoples participating? | Open code |
| 1. Who are Indigenous peoples participating with? | Open code |
| 1. At what scale is the participation taking place? | Deductive |
| 1. Does the literature discuss details about the participation? (Y/N) | Deductive |
| 1. Does the literature evaluate the participation? (Y/N) | Deductive |
| 1. Are Indigenous values, norms or methods used in the participation process? (Y/N) | Deductive |
| Variables used to code case studies |  |
| 1. Case study details | Open code |
| 1. What thematic focus or issue of water governance are Indigenous peoples engaging in? | Open code |
| 1. How are Indigenous peoples participating? | Open code |
| 1. Who are Indigenous peoples participating with? | Deductive |
| 1. At what scale is the participation taking place? | Deductive |
| 1. Are there details about the participation? (Y/N) | Deductive |
| 1. Are Indigenous values, norms or methods used in this participation process? (Y/N) | Deductive |
| 1. Is there an evaluation of the participation? (Y/N) | Deductive |
| 1. Paper detailing the evaluation (cross reference to paper) | - |

Coding for both papers and case studies was done using a mix of both inductive and deductive approaches depending on the variables. For example, while coding the scale of participation and who Indigenous peoples were participating with, we used a deductive approach, while we used an inductive approach while coding for the type of participation.

Coding for participation required an inductive approach with several iterations, since many existing typologies for participation did not capture the range of participatory processes encountered in the case studies. Open coding was used initially, and the codes were then consolidated based on themes (Table 5). Case studies that used vague wording to describe participation such as ‘working with’ or ‘engaged with’, were usually coded as general participation in the absence of additional information or description, even though these processes may have involved partnerships.

Table 5: Definitions for Participation codes

| ***Code*** | ***Definition*** |
| --- | --- |
| *Recognition* | Recognition refers to when certain groups are ‘recognized’ which could be on the basis of their common humanity, their differences or their individuality (Taylor, 2021). While multiple models of recognition exist, not all forms of recognition necessarily advance Indigenous aspirations (Jackson, 2018). We code case studies as recognition, where Indigenous peoples or their knowledge systems have been recognized or acknowledged in water laws, policies and plans, symbolically or otherwise. |
| *Representation* | Often viewed as a subset of recognition, representation refers to when seats on representative bodies are reserved for members of certain groups for example Indigenous peoples. (McBride, 2005) |
| *Inclusion of Indigenous knowledge and values*[[1]](#footnote-1) | Inclusion is defined as the act of ‘including,’ and there can be varying levels of inclusion. We code case studies as inclusion, where Indigenous peoples’ knowledge systems, perspectives and values are included in the participatory process. |
| *Consultation* | Consultation is a process where governments (or industry) consult indigenous peoples, “through appropriate procedures” when taking any measures that affect them (ILO, 1989). |
| *General, Undefined Participation or Policy engagement* | Any form of participation which is unclear, generalised or undefined. We also consolidated this with general policy engagement processes which can be viewed as the range of activities that can impact “government policies or political systems”(Kim, Yoon and Oh, 2023). |
| *Partnerships and Collaborations* | All forms of participatory processes where the term ‘partnership’ or ‘collaboration’ has been used. |
| *Negotiations* | Refers to policy engagement or participatory processes that lead to an agreement, often used in the context of treaty or water right negotiations. |
| *Legal engagement* | Refers to processes where Indigenous peoples engage through legal approaches, including through lawsuits, court cases or settlements such as around water rights or treaties. |
| *Resistance & Political Mobilization* | Refers to all forms of movements and initiatives where Indigenous peoples contest and oppose state policies and laws and thus engage in ‘created’ spaces of participation (Van Buuren, Van Meerkerk and Tortajada, 2019). Includes forms of advocacy, political mobilization, protests and marches. |

For the geographies, individual countries were coded, but for presenting results, certain countries were consolidated into a distinct region for example South America. There were three isolated studies on Japan, Sweden and New Caledonia, consolidated into ‘Others’. Results were described for the following distinct geographies: Australia, Canada, United States, New Zealand, South America, Others and Transboundary. Transboundary case studies were treated as a distinct geography even though they were all along the United States- Canada border and were studied separately to avoid any dilution of results. Moreover, they were also treated as a scale.

For scale, we used six codes: local, regional, provincial, federal, international, and transboundary.

Several variables, such as the type of participation and the scale of participation used multiple codes, and as a result, percentages had to be carefully calculated as sum of individual codes exceeded totals.

Additional variables for which case studies were coded for, included whether the case studies were described, evaluated and if Indigenous values, norms or methods were considered in the participation process. These variables were coded as either Yes or No. This last category is separate from the studies where the participation type was coded as “Inclusion of Indigenous knowledge and values”, because there were several studies of other types of participation that may have considered Indigenous values and norms.

# ADDITIONAL RESULTS

## No. of journal articles and case studies

Table 6 lists the total number of journal articles and case studies within each country. Transboundary articles and case studies were all from Canada and the United States, but they were counted separately to provide distinction. Percentages are calculated as a total of the articles (n=222) or case studies (n=182)

Table 6: Journal articles and case studies by country (no and %).

| **Country** | **Papers (no)** | **Papers**  **(%)** | **Case Studies (no)** | **Case Studies (%)** |
| --- | --- | --- | --- | --- |
| Australia | 78 | 35% | 57 | 31% |
| Canada | 60 | 27% | 31 | 17% |
| United States | 56 | 25% | 27 | 15% |
| New Zealand | 29 | 13% | 19 | 10% |
| Chile | 15 | 7% | 10 | 5% |
| Transboundary (US/Canada) | 14 | 6% | 6 | 3% |
| Brazil | 1 | 0% | 5 | 3% |
| Peru | 4 | 2% | 2 | 1% |
| Ecuador | 9 | 4% | 6 | 3% |
| Bolivia | 5 | 2% | 4 | 2% |
| Guatemala | 2 | 1% | 5 | 3% |
| Mexico | 4 | 2% | 4 | 2% |
| Colombia | 3 | 1% | 2 | 1% |
| Sweden | 1 | 0% | 1 | 1% |
| France | 1 | 0% | 0 | 0% |
| Japan | 1 | 0% | 2 | 1% |

## Journal articles by year

Figure 3 shows the year in which the journal articles were published and whether the article discussed a study within the CANZUS region (Canada, Australia, New Zealand or US) or discussed a non-CANZUS country or had examples of both.

Figure 3: No. of journal articles over time

## Case study scales by country/region and by scale

Table 7 shows the case studies of different scales within each country by region. Percentages are calculated both as a fraction of the total case studies in the country/region (Table 8), as well as the total case studies of that specific scale (Table 9).

Table 7: Case studies within each country/region at a certain scale

|  | **Total** | Australia | Canada | United States | New Zealand | South America | Others | Transboundary |
| --- | --- | --- | --- | --- | --- | --- | --- | --- |
| **Total** | **182** | **57** | **31** | **27** | **19** | **38** | **4** | **6** |
| Local | **81** | 27 | 11 | 5 | 8 | 28 | 2 | - |
| Regional | **45** | 14 | 3 | 11 | 6 | 11 | - | - |
| Provincial | **41** | 11 | 18 | 11 | - | 1 | - | - |
| Federal | **56** | 10 | 8 | 15 | 9 | 13 | 1 | - |
| International | **7** | 1 | - | - | - | 5 | 1 | - |
| Transboundary | **6** | - | - | - | - | - | - | 6 |

Table 8: Percentage of case studies within each country/region at a certain scale as a fraction of the total case studies in that country/region

|  | **Total** | Australia | Canada | United States | New Zealand | South America | Others | Transboundary |
| --- | --- | --- | --- | --- | --- | --- | --- | --- |
| ***Total*** | **100%** | 31% | 17% | 15% | 10% | 32% | 2% | 3% |
| *Local* | **45%** | 47% | 35% | 19% | 42% | 74% | 50% | 0% |
| *Regional* | **25%** | 25% | 10% | 41% | 32% | 29% | 0% | 0% |
| *Provincial* | **23%** | 19% | 58% | 41% | 0% | 3% | 0% | 0% |
| *Federal* | **31%** | 18% | 26% | 56% | 47% | 34% | 25% | 0% |
| *International* | **4%** | 2% | 0% | 0% | 0% | 13% | 25% | 0% |
| *Transboundary* | **3%** | 0% | 0% | 0% | 0% | 0% | 0% | 100% |

The percentages in the total column are a fraction of the total no. of case studies (n=182) while the percentages in the country/region columns are a fraction of the total no of case studies in that specific country /region.

Table 9: Percentage of case studies within each country/region at a certain scale as a fraction of the total case studies of that scale

|  | **Total** | Australia | Canada | United States | New Zealand | South America | Others | Transboundary |
| --- | --- | --- | --- | --- | --- | --- | --- | --- |
| ***Total*** | **100%** | 31% | 17% | 15% | 10% | 32% | 2% | 3% |
| *Local* | 45% | 33% | 14% | 6% | 10% | 35% | 2% | 0% |
| *Regional* | 25% | 31% | 7% | 24% | 13% | 24% | 0% | 0% |
| *Provincial* | 23% | 27% | 44% | 27% | 0% | 2% | 0% | 0% |
| *Federal* | 31% | 18% | 14% | 27% | 16% | 23% | 2% | 0% |
| *International* | 4% | 14% | 0% | 0% | 0% | 71% | 14% | 0% |
| *Transboundary* | 3% | 0% | 0% | 0% | 0% | 0% | 0% | 100% |

The percentages in the total column are a fraction of the total no. of case studies (n=182) while the percentages in the country/region columns are a fraction of the total no of case studies in that specific scale.

## Participation types by country/region

Table 10 lists the types of participation within each country region. Totals are shown, but percentages are calculated both as a fraction of the total country/region case studies (Table 11) as well as the fraction of the total participation type (Table 12).

Table 10: Participation type by country/ region (totals)

|  | Total | Australia | Canada | United States | New Zealand | South America | Others | Transboundary |
| --- | --- | --- | --- | --- | --- | --- | --- | --- |
| **Total** | **182** | **57** | **31** | **27** | **19** | **38** | **4** | **6** |
| *Recognition* | **24** | 15 | 3 | 2 | 2 | 1 | 1 | - |
| *Representation* | **24** | 11 | 3 | 1 | 1 | 3 | - | 5 |
| *Inclusion of Indigenous knowledge and values* | **15** | 4 | 4 | - | 5 | 1 | - | 1 |
| *Consultation* | **8** | 1 | 1 | - | 1 | 5 | - | - |
| *General, undefined Participation or Policy engagement* | **44** | 16 | 12 | 3 | 6 | 3 | 2 | 2 |
| *Partnerships & Collaborations* | **29** | 14 | 8 | 2 | 5 | - | - | - |
| *Negotiations & Agreements* | **10** | 2 | 2 | 4 | 1 | 1 | - | - |
| *Legal engagement* | **40** | 4 | 3 | 19 | 5 | 7 | 1 | 1 |
| *Resistance & Political Mobilization* | **29** | - | - | 4 | - | 25 | - | - |

Table 11: Percentage of case studies of a certain participation type within each country/region as a fraction of the total case studies of that country/region

|  | **Total** | Australia | Canada | United States | New Zealand | South America | Others | Transboundary |
| --- | --- | --- | --- | --- | --- | --- | --- | --- |
| **Total** | **100%** | **31%** | **17%** | **15%** | **10%** | **32%** | **2%** | **3%** |
| *Recognition* | **13%** | 26% | 10% | 7% | 11% | 3% | 25% | 0% |
| *Representation* | **13%** | 19% | 10% | 4% | 5% | 8% | 0% | 83% |
| *Inclusion of Indigenous knowledge*  *and values* | **8%** | 7% | 13% | 0% | 26% | 3% | 0% | 17% |
| *Consultation* | **4%** | 2% | 3% | 0% | 5% | 13% | 0% | 0% |
| *General, undefined Participation or Policy engagement* | **24%** | 28% | 39% | 11% | 32% | 8% | 50% | 33% |
| *Partnerships & Collaborations* | **16%** | 25% | 26% | 7% | 26% | 0% | 0% | 0% |
| *Negotiations & Agreements* | **5%** | 4% | 6% | 15% | 5% | 3% | 0% | 0% |
| *Legal engagement* | **22%** | 7% | 10% | 70% | 26% | 18% | 25% | 17% |
| *Resistance & Political Mobilization* | **16%** | 0% | 0% | 15% | 0% | 66% | 0% | 0% |

The percentages in the total column are a fraction of the total no. of case studies (n=182) while the percentages in the country/region columns are a fraction of the total no of case studies in that specific country/region.

Table 12: Percentage of case studies of a certain participation type within each country/ region as a fraction of the total case studies of that participation type.

|  | Total | Australia | Canada | United States | New Zealand | South America | Others | Transboundary |
| --- | --- | --- | --- | --- | --- | --- | --- | --- |
| **Total** | **100%** | **31%** | **17%** | **15%** | **10%** | **32%** | **2%** | **3%** |
| *Recognition* | **13%** | 63% | 13% | 8% | 8% | 4% | 4% | 0% |
| *Representation* | **13%** | 46% | 13% | 4% | 4% | 13% | 0% | 21% |
| *Inclusion of Indigenous knowledge and values* | **8%** | 27% | 27% | 0% | 33% | 7% | 0% | 7% |
| *Consultation* | **4%** | 13% | 13% | 0% | 13% | 63% | 0% | 0% |
| *General, undefined Participation or Policy engagement* | **24%** | 36% | 27% | 7% | 14% | 7% | 5% | 5% |
| *Partnerships & Collaborations* | **16%** | 48% | 28% | 7% | 17% | 0% | 0% | 0% |
| *Negotiations & Agreements* | **5%** | 20% | 20% | 40% | 10% | 10% | 0% | 0% |
| *Legal engagement* | **22%** | 10% | 8% | 48% | 13% | 18% | 3% | 3% |
| *Resistance & Political Mobilization* | **16%** | 0% | 0% | 14% | 0% | 86% | 0% | 0% |

The percentages in the total column are a fraction of the total no. of case studies (n=182) while the percentages in the country/region columns are a fraction of the total no of case studies of that specific participation type.

## Participation types by scale

Table 13 lists the types of participation within each scale. Totals are shown, and percentages are calculated both as a fraction of the totals of that specific scale (Table 14)as well as the fraction of the total participation type (Table 15).

Table 13: Different participation types at a certain scale

|  | TOTAL | Local | Regional | Provincial | Federal | International | Transboundary |
| --- | --- | --- | --- | --- | --- | --- | --- |
| ***Total*** | **182** | **81** | **45** | **41** | **56** | **7** | **6** |
| *Recognition* | **24** | 6 | 1 | 9 | 8 | 0 | 0 |
| *Representation* | **24** | 11 | 5 | 2 | 5 | 0 | 5 |
| *Inclusion of Indigenous knowledge and values* | **15** | 3 | 4 | 4 | 5 | 1 | 1 |
| *Consultation* | **8** | 5 | 3 | 2 | 2 | 1 | 0 |
| *General, undefined Participation or Policy engagement* | **44** | 22 | 9 | 7 | 7 | 3 | 2 |
| *Partnerships & Collaborations* | **29** | 15 | 11 | 6 | 4 | 0 | 0 |
| *Negotiations & Agreements* | **10** | 3 | 4 | 2 | 7 | 0 | 0 |
| *Legal engagement* | **40** | 10 | 14 | 13 | 24 | 2 | 1 |
| *Resistance & Political Mobilization* | **29** | 23 | 11 | 2 | 11 | 2 | 0 |

Table 14: Percentage of case studies of a certain participation type at each scale as a fraction of the total case studies within that scale.

|  | TOTAL | Local | Regional | Provincial | Federal | International | Transboundary |
| --- | --- | --- | --- | --- | --- | --- | --- |
| ***Total*** | **100%** | **45%** | **25%** | **23%** | **31%** | **4%** | **3%** |
| *Recognition* | **13%** | 7% | 2% | 22% | 14% | 0% | 0% |
| *Representation* | **13%** | 14% | 11% | 5% | 9% | 0% | 83% |
| *Inclusion of Indigenous knowledge and values* | **8%** | 4% | 9% | 10% | 9% | 14% | 17% |
| *Consultation* | **4%** | 6% | 7% | 5% | 4% | 14% | 0% |
| *General, undefined Participation or Policy engagement* | **24%** | 27% | 20% | 17% | 13% | 43% | 33% |
| *Partnerships & Collaborations* | **16%** | 19% | 24% | 15% | 7% | 0% | 0% |
| *Negotiations & Agreements* | **5%** | 4% | 9% | 5% | 13% | 0% | 0% |
| *Legal engagement* | **22%** | 12% | 31% | 32% | 43% | 29% | 17% |
| *Resistance & Political Mobilization* | **16%** | 28% | 24% | 5% | 20% | 29% | 0% |

The percentages in the total column are a fraction of the total no. of case studies (n=182) while the percentages in the country/region columns are a fraction of the total no of case studies of that specific scale.

Table 15: Percentage of case studies of a certain participation type at each scale as a fraction of the total case studies of that participation type.

|  | TOTAL | Local | Regional | Provincial | Federal | International | Transboundary |
| --- | --- | --- | --- | --- | --- | --- | --- |
| **Total** | **100%** | **45%** | **25%** | **23%** | **31%** | **4%** | **3%** |
| *Recognition* | **13%** | 25% | 4% | 38% | 33% | 0% | 0% |
| *Representation* | **13%** | 46% | 21% | 8% | 21% | 0% | 21% |
| *Inclusion of Indigenous knowledge and values* | **8%** | 20% | 27% | 27% | 33% | 7% | 7% |
| *Consultation* | **4%** | 63% | 38% | 25% | 25% | 13% | 0% |
| *General, undefined Participation or Policy engagement* | **24%** | 50% | 20% | 16% | 16% | 7% | 5% |
| *Partnerships & Collaborations* | **16%** | 52% | 38% | 21% | 14% | 0% | 0% |
| *Negotiations & Agreements* | **5%** | 30% | 40% | 20% | 70% | 0% | 0% |
| *Legal engagement* | **22%** | 25% | 35% | 33% | 60% | 5% | 3% |
| *Resistance & Political Mobilization* | **16%** | 79% | 38% | 7% | 38% | 7% | 0% |

The percentages in the total column are a fraction of the total no. of case studies (n=182) while the percentages in the country/region columns are a fraction of the total no of case studies of that specific participation type.

## Themes by country/region

Table 16 lists the themes within country/region. Totals are shown, and percentages are calculated both as a fraction of the totals of that specific country/region (Table 17) as well as the fraction of the total theme (Table 18).

Table 16: Different participation themes by country/region

|  | **Total** | Australia | Canada | United States | New Zealand | South America | Others | Transboundary |
| --- | --- | --- | --- | --- | --- | --- | --- | --- |
| ***Total*** | **182** | **57** | **31** | **27** | **19** | **38** | **4** | **6** |
| *Water rights & laws* | **39** | 6 | 2 | 17 | 2 | 12 | - | - |
| *General water & water governance* | **36** | 22 | 3 | 1 | 2 | 4 | 2 | 2 |
| *Dams, mining & development projects* | **27** | 4 | 2 | 4 | - | 15 | 2 | - |
| *Indigenous knowledge & cultural flows* | **13** | 5 | 3 | - | 4 | - | - | 1 |
| *Lakes and rivers* | **15** | 3 | 1 | 2 | 8 | - | - | 1 |
| *Water Quality & Pollution* | **13** | 1 | - | 9 | - | 3 | - | - |
| *Groundwater* | **5** | 3 | - | 1 | - | 1 | - | - |
| *Drinking water & source water protection* | **6** | - | 6 | - | - | - | - | - |
| *Environmental Watering & environmental flows* | **10** | 10 | - | - | - | - | - | - |
| *Conservation & watershed management* | **12** | 1 | 9 | - | - | 1 | - | 1 |
| *Floods* | **3** | - | 2 | - | 1 | - | - | - |

Table 17: Percentage of case studies of a certain theme within each country/region as a fraction of the total case studies within that country/region.

|  | **Total** | Australia | Canada | US | New Zealand | South America | Others | Transboundary |
| --- | --- | --- | --- | --- | --- | --- | --- | --- |
| ***Total*** | **100%** | **31%** | **17%** | **15%** | **10%** | **32%** | **2%** | **3%** |
| *Water rights & laws* | **21%** | 11% | 6% | 63% | 11% | 32% | 0% | 0% |
| *General water & water governance* | **20%** | 39% | 10% | 4% | 11% | 11% | 50% | 33% |
| *Dams, mining & development projects* | **15%** | 7% | 6% | 15% | 0% | 39% | 50% | 0% |
| *Indigenous knowledge & cultural flows* | **7%** | 9% | 10% | 0% | 21% | 0% | 0% | 17% |
| *Lakes & rivers* | **8%** | 5% | 3% | 7% | 42% | 0% | 0% | 17% |
| *Water Quality & Pollution* | **7%** | 2% | 0% | 33% | 0% | 8% | 0% | 0% |
| *Groundwater* | **3%** | 5% | 0% | 4% | 0% | 3% | 0% | 0% |
| *Drinking water & source water protection* | **3%** | 0% | 19% | 0% | 0% | 0% | 0% | 0% |
| *Environmental Watering & flows* | **5%** | 18% | 0% | 0% | 0% | 0% | 0% | 0% |
| *Conservation & watershed management* | **7%** | 2% | 29% | 0% | 0% | 3% | 0% | 17% |
| *Floods* | **2%** | 0% | 6% | 0% | 5% | 0% | 0% | 0% |

Table 18: Percentage of case studies of a certain theme within each country/region as a fraction of the total case studies of that participation theme.

|  | Total | Australia | Canada | United States | New Zealand | South America | Others | Transboundary |
| --- | --- | --- | --- | --- | --- | --- | --- | --- |
| ***Total*** | **100%** | 15% | 5% | 44% | 5% | 32% | 0% | 0% |
| *Water rights & laws* | 21% | 61% | 8% | 3% | 6% | 31% | 6% | 6% |
| *General water & water governance* | 20% | 15% | 7% | 15% | 0% | 11% | 7% | 0% |
| *Dams, mining & development projects* | 15% | 38% | 23% | 0% | 31% | 56% | 0% | 8% |
| *Indigenous knowledge & cultural flows* | 7% | 20% | 7% | 13% | 53% | 0% | 0% | 7% |
| *Lakes & rivers* | 8% | 8% | 0% | 69% | 0% | 0% | 0% | 0% |
| *Water Quality & Pollution* | 7% | 60% | 0% | 20% | 0% | 23% | 0% | 0% |
| *Groundwater* | 3% | 0% | 100% | 0% | 0% | 20% | 0% | 0% |
| *Drinking water & source water protection* | 3% | 100% | 0% | 0% | 0% | 0% | 0% | 0% |
| *Environmental Watering & flows* | 5% | 8% | 75% | 0% | 0% | 0% | 0% | 8% |
| *Conservation & watershed management* | 7% | 0% | 67% | 0% | 33% | 8% | 0% | 0% |
| *Floods* | 2% | 15% | 5% | 44% | 5% | 0% | 0% | 0% |

## Theme by scale

Table 19 lists the types of participation within each scale. Totals are shown, and percentages are calculated both as a fraction of the totals of that specific scale (Table 20)as well as the fraction of the total participation type (Table 21).

Table 19: Different participation themes at a certain scale

|  | TOTAL | Local | Regional | Provincial | Federal | International | Transboundary |
| --- | --- | --- | --- | --- | --- | --- | --- |
| ***Total*** | **182** | **81** | **45** | **41** | **56** | **7** | **6** |
| *Water rights & laws* | 39 | 12 | 9 | 14 | 23 | 1 | 0 |
| *General water & water governance* | 36 | 10 | 8 | 7 | 9 | 4 | 2 |
| *Dams, mining & development projects* | 27 | 14 | 8 | 4 | 5 | 2 | 0 |
| *Indigenous knowledge & cultural flows* | 13 | 3 | 2 | 3 | 4 | 0 | 1 |
| *Lakes & rivers* | 15 | 7 | 9 | 0 | 4 | 0 | 1 |
| *Water Quality & Pollution* | 13 | 4 | 3 | 5 | 6 | 0 | 0 |
| *Groundwater* | 5 | 3 | 0 | 2 | 2 | 0 | 0 |
| *Drinking water & source water protection* | 6 | 5 | 0 | 3 | 2 | 0 | 0 |
| *Environmental Watering & flows* | 10 | 7 | 3 | 1 | 1 | 0 | 0 |
| *Conservation & watershed management* | 12 | 7 | 3 | 4 | 0 | 0 | 1 |
| *Floods* | 3 | 2 | 0 | 1 | 2 | 0 | 0 |

Table 20: Percentage of case studies of a certain theme within each scale as a fraction of the total case studies of that scale.

|  | TOTAL | Local | Regional | Provincial | Federal | International | Transboundary |
| --- | --- | --- | --- | --- | --- | --- | --- |
| **Total** | **100%** | **45%** | **25%** | **23%** | **31%** | **4%** | **3%** |
| Water rights & laws | **21%** | 15% | 20% | 34% | 41% | 14% | 0% |
| General water & water governance | **20%** | 12% | 18% | 17% | 16% | 57% | 33% |
| Dams, mining & development projects | **15%** | 17% | 18% | 10% | 9% | 29% | 0% |
| Indigenous knowledge & cultural flows | **7%** | 4% | 4% | 7% | 7% | 0% | 17% |
| Lakes & rivers | **8%** | 9% | 20% | 0% | 7% | 0% | 17% |
| Water Quality & Pollution | **7%** | 5% | 7% | 12% | 11% | 0% | 0% |
| Groundwater | **3%** | 4% | 0% | 5% | 4% | 0% | 0% |
| Drinking water & source water protection | **3%** | 6% | 0% | 7% | 4% | 0% | 0% |
| Environmental Watering & flows | **5%** | 9% | 7% | 2% | 2% | 0% | 0% |
| Conservation & watershed management | **7%** | 9% | 7% | 10% | 0% | 0% | 17% |
| Floods | **2%** | 2% | 0% | 2% | 4% | 0% | 0% |

Table 21: Percentage of case studies of a certain theme within each country/region as a fraction of the total case studies of that theme.

|  | **TOTAL** | Local | Regional | Provincial | Federal | International | Transboundary |
| --- | --- | --- | --- | --- | --- | --- | --- |
| ***Total*** | **100%** | **45%** | **25%** | **23%** | **31%** | **4%** | **3%** |
| *Water rights & laws* | **21%** | 25% | 4% | 38% | 33% | 0% | 0% |
| *General water & water governance* | **20%** | 31% | 23% | 36% | 59% | 3% | 0% |
| *Dams, mining & development projects* | **15%** | 28% | 22% | 19% | 25% | 11% | 6% |
| *Indigenous knowledge & cultural flows* | **7%** | 52% | 30% | 15% | 19% | 7% | 0% |
| *Lakes & rivers* | **8%** | 23% | 15% | 23% | 31% | 0% | 8% |
| *Water Quality & Pollution* | **7%** | 47% | 60% | 0% | 27% | 0% | 7% |
| *Groundwater* | **3%** | 31% | 23% | 38% | 46% | 0% | 0% |
| *Drinking water & source water protection* | **3%** | 60% | 0% | 40% | 40% | 0% | 0% |
| *Environmental Watering & flows* | **5%** | 83% | 0% | 50% | 33% | 0% | 0% |
| *Conservation & watershed management* | **7%** | 70% | 30% | 10% | 10% | 0% | 0% |
| *Floods* | **2%** | 58% | 25% | 33% | 0% | 0% | 8% |

## Selected Case studies with evaluation

Of the 182 case studies, 27 case studies had some form of evaluation. A distinction was made on whether the evaluation was limited, that is there were only a few sentences around the process, its outcomes and generalised recommendations, or it was detailed evaluation, where there was a more in-depth discussion about the process of participation and its outcomes. Only 7 case studies provided detailed evaluations of the process. In the remainer 20 of the case studies, the evaluation was limited to brief discussion about the positive or negative attributes of the process. There was only one case study where an evaluation was conducted where Indigenous peoples took part in the process of evaluation, and this was the evaluation of the Murray Darling Basin Plan (Goff, 2020; Quitian & Rodríguez, 2016).

|  | Case study | Paper providing evaluation | Type of evaluation |
| --- | --- | --- | --- |
| 1 | National Water Initiative | (Cranney and Tan, 2011; O’Donnell, 2013) | Detailed |
| 2 | NSW Aboriginal Water Initiative (AWI) | (Moggridge, Betterridge and Thompson, 2019) | Detailed |
| 3 | Murray–Darling Basin Authority’s (MDBA) Basin Plan | (Quitian and Rodríguez, 2016; Goff, 2020) | Detailed |
| 4 | River Murray Water Allocation Plan | (Jackson et al., 2012) | Limited |
| 5 | Aboriginal Waterways Assessment Program | (Poirier and Schartmueller, 2012; Mooney and Cullen, 2019) | Detailed |
| 6 | Tiwi Islands Planning | (Jackson et al., 2012; Ayre, Wallis and Daniell, 2018) | Limited |
| 7 | Safe and Healthy Drinking Water initiative | (Hall, Grodecki, et al., 2021; Hall, Lee, et al., 2021) | Limited |
| 8 | Ord River Planning | (Ayre and Mackenzie, 2013) | Detailed |
| 9 | Gulf catchments, Queensland | (Ayre and Mackenzie, 2013) | Detailed |
| 10 | Rio Tinto Iron Ore (RTIO) and Indigenous engagement in the Pilbara region | (Barber and Jackson, 2012) | Limited |
| 11 | Case study of Mirarr Indigenous people Gundjeihmi through Aboriginal Corporation (GAC) and the Energy Resources of Australia in the Ranger Uranium Mine in the Northern Territory, Australia. | (Hart et al., 2015) | Limited |
| 12 | Bana Yarralji Bubu Inc. /Kuku Nyungkal people case study in the Wet Tropics region. | (Maclean and Bana Yarralji Bubu Inc, 2015) | Limited |
| 13 | Daly River Planning and Community Reference Group | (Jackson, 2006) | Limited |
| 14 | NWT Water Stewardship Strategy | (Latta, 2018) | Limited |
| 15 | Friends of the Nemaiah Valley (FONV) engagement with the Xeni Gwet’in First Nation | (Von Der Porten, De Loë and McGregor, 2016) | Limited |
| 16 | Okanagan First Nations engagement with the Okanagan Basin Water Board | (Von Der Porten, De Loë and McGregor, 2016) | Limited |
| 17 | Lower Similkameen  Case Study | (Simms et al., 2016) | Limited |
| 18 | Consultation by the Water Stewardship Division of the BC Ministry of Environment on the Water Sustainability Act | (Von Der Porten and De Loë, 2014; Simms et al., 2016; Von Der Porten, De Loë and McGregor, 2016; Jollymore, McFarlane and Harris, 2018) | Detailed |
| 19 | Consultation for EIAs in southern Chile | (Höhl et al., 2021) | Limited |
| 20 | Māori participation on the Hurunui river | (C. Thomas, 2015) | Limited |
| 21 | Indigenous engagement in the permitting process of the Atlantic Coast Pipeline (ACP) | (Emanuel and Wilkins, 2020) | Detailed |
| 22 | Karuk Tribe engagement in the Klamath Basin | (Diver *et al.*, 2022) | Limited |
| 23 | 2012 Colorado River Water Supply and Demand Study | (Chief, Meadow and Whyte, 2016) | Limited |
| 24 | Great Lakes | (Lukawiecki et al., 2021) | Limited |
| 25 | Columbia River Basin Treaty | (Von Der Porten, De Loë and McGregor, 2016) | Limited |
| 26 | Rainy Lake | (Strube and Thomas, 2021) | Limited |
| 27 | International Joint Commission | (Strube and Thomas, 2021) | Limited |

## Case studies where Indigenous values and knowledge were considered in water governance

There were several case studies where insufficient detail was provided to determine if Indigenous values or knowledge was considered in participatory processes. Of the 182 case studies, only 33 case studies specifically mentioned that they considered Indigenous values, or knowledge in the process.

|  | Case study | Relevant paper |
| --- | --- | --- |
| 1 | National Cultural Flows Research Project | (Taylor, Moggridge and Poelina, 2016; Bischoff-Mattson and Lynch, 2017; Moggridge and Thompson, 2021; Moggridge, Thompson and Radoll, 2022) |
| 2 | NSW Aboriginal Water Initiative (AWI) | (Moggridge, Betterridge and Thompson, 2019; Moggridge and Thompson, 2021; Moggridge, Thompson and Radoll, 2022) |
| 3 | Murray–Darling Basin Authority’s (MDBA) Basin Plan | (Quitian and Rodríguez, 2016; Goff, 2020) |
| 4 | Yarra River Protection Act | (Poelina, Bagnall and Lim, 2020; Provis, 2020) |
| 5 | Living Murray Initiative | (Jackson, 2005; Taylor, Moggridge and Poelina, 2016) |
| 6 | Aboriginal Waterways Assessment Program | (Poirier and Schartmueller, 2012; Mooney and Cullen, 2019) |
| 7 | Garma Indigenous Peoples Declaration | (Taylor, Moggridge and Poelina, 2016), |
| 8 | Barmaha-Millewa | (Robinson *et al.*, 2015) |
| 9 | Rio Tinto Iron Ore (RTIO) Study on Indigenous values in the Pilbara region | (Barber and Jackson, 2012) |
| 10 | Milingimbi Water Project | (Hayashi *et al.*, 2021)- |
| 11 | Bana Yarralji Bubu Inc., Report | (Maclean and Bana Yarralji Bubu Inc, 2015) |
| 12 | Daly River Planning | (Jackson, 2005) |
| 13 | Fitzroy River Declaration and Fitzroy (Martuwarra) Council. | (Poelina, Bagnall and Lim, 2020; Bates *et al.*, 2023) |
| 14 | Brasilia Declration | (Young, Down and Mascher, 2023) |
| 15 | NWT Water Stewardship Strategy | (Latta, 2018) |
| 16 | Friends of the Nemaiah Valley (FONV) engagement with the Xeni Gwet’in First Nation, | (Von Der Porten, De Loë and McGregor, 2016) |
| 17 | Okanagan Nation Alliance adopted Siwlkw / En'owkin. | (Pahl-Wostl, 2020; Linton and Pahl-Wostl, 2023) |
| 18 | Adoption of the Cowichan Tribes principle. | (Curran, 2019; Curran, Gleeson and Huggins, 2023) |
| 19 | Mistawasis Nêhiyawak First Nation WG project | (Mora *et al.*, 2022) |
| 20 | Application of Yinka Dene | (Curran, 2019) |
| 21 | World Water Forum – Kyoto Declaration | (McGregor, 2012; Taylor, Moggridge and Poelina, 2016; Berry *et al.*, 2018) |
| 22 | World Water Forum - Mexico | (McGregor, 2012) |
| 23 | Cultural Health Index | (Jackson, 2005; Moggridge, Thompson and Radoll, 2022) |
| 24 | Murihiku Cultural Water Classification System | (Kitson *et al.*, 2018) |
| 25 | Legal Personhood of Whanganui River | (Frame, 2018; O’Bryan, 2019; Pahl-Wostl, 2020; Poelina, Bagnall and Lim, 2020; Strang, 2021; Young, Down and Mascher, 2023). |
| 26 | The Waikato River Settlement Act | Waikato River (Bryan, 2017; Hughey, Jacobson and Smith, 2017; Pirsoul and Armoudian, 2019; Fisher and Parsons, 2020), |
| 27 | Maori participation on the Hurunui River | (C. Thomas, 2015) |
| 28 | Waipa river act | (Fisher and Parsons, 2020)- |
| 29 | Lake Ellesmere and Te Waiharo | (Memon and Kirk, 2012) |
| 30 | Waitaki River catchment - | (Taylor *et al.*, 2021) |
| 31 | Indigenous engagement with the Rotorua Lakes Council (RLC). | (Strang, 2014) |
| 32 | MRLF | (Van den Belt, Schiele and Forgie, 2013) |
| 33 | Great Lakes | (Lukawiecki *et al.*, 2021) |

## Complete Reference List

1. MERRILL, J. ABORIGINAL WATER RIGHTS. *Nat. Resour. J.* **20**, 45–70 (1980).

2. Cosens, B. A. A new approach in water management or business as usual? The milk river, Montana. *J. Environ. Law Litig.* **18**, 1–50 (2003).

3. Durette, M. A comparative approach to Indigenous legal rights to freshwater: Key lessons for Australia from the United States, Canada and New Zealand. *Environ. Plan. Law J.* **27**, 296–315 (2010).

4. Bark, R. H., Garrick, D. E., Robinson, C. J. & Jackson, S. Adaptive basin governance and the prospects for meeting Indigenous water claims. *Environ. Sci. Policy* **19**, 169–177 (2012).

5. Armijos, M. ‘They Cannot Come and Impose on Us’ Indigenous Autonomy and Resource Control through Collective Water Management in Highland Ecuador. *Radic. Hist. Rev.* 86–103 (2013) doi:10.1215/01636545-1965702.

6. Ayre, M. & Mackenzie, J. ‘Unwritten, unsaid, just known’: the role of Indigenous knowledge(s) in water planning in Australia. *Local Environ.* **18**, 753–768 (2013).

7. Jetoo, S. & Krantzberg, G. A swot analysis of the great lakes water quality protocol 2012: The good, the bad and the opportunity. *Electron. Green J.* **1**, (2014).

8. Cosens, B. & Chaffin, B. C. Adaptive governance of water resources shared with indigenous peoples: The role of law. *Water Switz.* **8**, (2016).

9. Hemming, S., Rigney, D., Muller, S. L., Rigney, G. & Campbell, I. A new direction for water management? Indigenous nation building as a strategy for river health. *Ecol. Soc.* **22**, (2017).

10. Hughey, K. F. D., Jacobson, C. & Smith, E. F. A framework for comparing collaborative management of Australian and New Zealand water resources. *Ecol. Soc.* **22**, (2017).

11. Hinzo, A. ‘We’re not going to sit idly by:’ 45 Years of Asserting Native Sovereignty Along the Missouri River in Nebraska. *DECOLONIZATION-Indig. Educ. Soc.* **7**, 200–214 (2018).

12. Curley, A. ‘Our Winters’ Rights’: Challenging Colonial Water Laws. *Glob. Environ. Polit.* **19**, 57–76 (2019).

13. Wilson, N. J. “Seeing water like a state?”: Indigenous water governance through Yukon First nation self-government agreements. *Geoforum* **104**, 101–113 (2019).

14. Ellis, R. & Perry, D. A Confluence of Anticolonial Pathways for Indigenous Sacred Site Protection. *J. Contemp. WATER Res. Educ.* **169**, 8–26 (2020).

15. Pahl-Wostl, C. Adaptive and sustainable water management: from improved conceptual foundations to transformative change. *Int. J. Water Resour. Dev.* **36**, 397–415 (2020).

16. York, A. M. *et al.* Agricultural water governance in the desert: Shifting risks in central Arizona. *Water Altern.* **13**, 418–445 (2020).

17. Hayashi, Y. *et al.* A transdisciplinary engagement with Australian Aboriginal water and the hydrology of a small bedrock island. *Hydrol. Sci. J.* **66**, 1845–1856 (2021).

18. Underhill, V., Sabati, S. & Beckett, L. Against settler sustainability: California’s groundwater as a vertical frontier. *Environ. Plan. E-Nat. SPACE* (2022) doi:10.1177/25148486221110434.

19. Bates, W. *et al.* A tale of two rivers - Baaka and Martuwarra, Australia: Shared voices and art towards water justice. *Anthr. Rev.* (2023) doi:10.1177/20530196231186962.

20. Gagnon, V. S. “WATER AND ALL MY RELATIONS”: REIMAGINING INDIGENOUS WATER JUSTICE FOR SEVEN GENERATIONS. *Hum. Organ.* **82**, 274–287 (2023).

21. McKibbin, C. (Re-)Envisioning Natural Resource Management Involving First Nations: Toward an Effective Co-Management Policy. *Water Switz.* **15**, (2023).

22. Boelens, R. & Gelles, P. H. Cultural politics, communal resistance and identity in Andean irrigation development. *Bull. Lat. Am. Res.* **24**, 311–327 (2005).

23. Jackson, S. Compartmentalising Culture: the articulation and consideration of Indigenous values in water resource management. *Aust. Geogr.* **37**, 19–31 (2006).

24. Boelens, R., Duarte, B., Manosalvas, R., Mena, P. & Avendaño, T. R. Contested territories: Water rights and the struggles over indigenous livelihoods. *Int. Indig. Policy J.* **3**, (2012).

25. Norman, E. S. Cultural politics and transboundary resource governance in the Salish Sea. *Water Altern.* **5**, 138–160 (2012).

26. Maclean, K. Crossing cultural boundaries: Integrating Indigenous water knowledge into water governance through co-research in the Queensland Wet Tropics, Australia. *Geoforum* **59**, 142–152 (2015).

27. Nursey-Bray, M. Cultural indicators, country and culture: The Arabana, change and water. *Rangel. J.* **37**, 555–569 (2015).

28. Furber, A., Medema, W., Adamowski, J., Clamen, M. & Vijay, M. Conflict management in participatory approaches to water management: A case study of lake Ontario and the St. Lawrence River regulation. *Water Switz.* **8**, (2016).

29. Kanwar, P., Kaza, S. & Bowden, W. An evaluation of Maori values in multiscalar environmental policies governing Kaipara Harbour in New Zealand. *Int. J. WATER Resour. Dev.* **32**, 26–42 (2016).

30. Morris, M. & de Loë, R. C. Cooperative and adaptive transboundary water governance in Canada’s Mackenzie River Basin: Status and prospects. *Ecol. Soc.* **21**, (2016).

31. Taylor, K. S., Moggridge, B. J. & Poelina, A. Australian Indigenous Water Policy and the impacts of the ever-changing political cycle. *Australas. J. Water Resour.* **20**, 132–147 (2016).

32. Black, K. & McBean, E. Community-based operator training and appropriate certification regimes for Indigenous water and wastewater systems. *Can. Water Resour. J.* **42**, 237–247 (2017).

33. Black, K. & McBean, E. Analysis of challenges and opportunities to meaningful Indigenous engagement in sustainable water and wastewater management. *Water Policy* **19**, 709–723 (2017).

34. Macpherson, E. BEYOND RECOGNITION: LESSONS FROM CHILE FOR ALLOCATING INDIGENOUS WATER RIGHTS IN AUSTRALIA. *Univ. NEW SOUTH WALES LAW J.* **40**, 1130–1169 (2017).

35. Conroy, C., Knight, A. R., Wassens, S. & Allan, C. Consequences of changed water management for Aboriginal Australians in the Murrumbidgee catchment, NSW. *Aust. Geogr.* **50**, 169–184 (2019).

36. Emanuel, R. E. & Wilkins, D. E. Breaching barriers: The fight for Indigenous participation in water governance. *Water* **12**, 2113 (2020).

37. Grafton, Q., Colloff, M., Marshall, V. & Williams, J. Confronting a’post-truth water world’in the Murray-Darling Basin, Australia. (2020).

38. Lennon, J. & Davis, K. Cultural landscape protection at Lake Victoria, a managed water supply. *Landsc. Res.* **45**, 265–279 (2020).

39. Basel, B., Hernández Quiroz, N., Velasco Herrera, R., Santiago Alonso, C. & Hoogesteger, J. Bee mietii rak rkabni nis (The people know how to seed water): A Zapotec experience in adapting to water scarcity and drought. *Clim. Dev.* **13**, 792–806 (2021).

40. Cantillana, R. & Iniesta-Arandia, I. Beyond scarcity and its management: sociocultural dimensions of the water crisis in the Atacama Desert. *WATER POLICY* **24**, 1124–1145 (2022).

41. Sinner, J. *et al.* Crafting Collective Management Institutions in Messy Real-World Settings: A Call for Action Research. *Int. J. COMMONS* **16**, 1–13 (2022).

42. Almack, K., Dunlop, E. S., Lauzon, R., Nadjiwon, S. & Duncan, A. T. Building trust through the Two-Eyed Seeing approach to joint fisheries research. *J. Gt. Lakes Res.* **49**, S46–S57 (2023).

43. Curran, D., Gleeson, T. & Huggins, X. Applying a science-forward approach to groundwater regulatory design. *Hydrogeol. J.* **31**, 853–871 (2023).

44. Fabris, M. Articulating Indigenous Law as “Environmental Protection”? The Piikani Nation and the Oldman River Dam Environmental Assessment Review Process. *Ann. Am. Assoc. Geogr.* **113**, 1664–1673 (2023).

45. Bartlett, R. H. Hydroelectric power and Indian water rights on the Prairies. *Prairie Forum* **14**, 177–193 (1989).

46. Luck, J. Diversions of Nevada’s Truckee River foreshadow doom for endangered species. *Nat. Resour. J.* **31**, 931–948 (1991).

47. Assies, W. David versus Goliath in Cochabamba: Water rights, neoliberalism, and the revival of social protest in Bolivia. *Lat. Am. Perspect.* **30**, 14–36 (2003).

48. De Vos, H., Boelens, R. & Bustamante, R. Formal law and local water control in the Andean region: A fiercely contested field. *Int. J. WATER Resour. Dev.* **22**, 37–48 (2006).

49. Porter, K. S. Govern or be governed? The watershed challenge for American Indians. *J. Water Law* **19**, 3–19 (2008).

50. Vaux, H. Equity in Policy: Failure and Opportunity. *Nat. Resour. J.* **50**, 517–538 (2010).

51. McLean, J. From Dispossession to Compensation: a political ecology of the Ord Final Agreement as a partial success story for Indigenous traditional owners. *Aust. Geogr.* **43**, 339–355 (2012).

52. Perreault, T., Wraight, S. & Perreault, M. Environmental injustice in the onondaga lake waterscape, New York State, USA. *Water Altern.* **5**, 485–506 (2012).

53. Tipa, G. & Nelson, K. Identifying cultural flow preferences: Kakaunui river case study. *J. Water Resour. Plan. Manag.* **138**, 660–670 (2012).

54. Tan, P.-L. & Jackson, S. Impossible dreaming - Does Australia’s water law and policy fulfil Indigenous aspirations? *Environ. Plan. Law J.* **30**, 132–149 (2013).

55. Escott, H., Beavis, S. & Reeves, A. Incentives and constraints to Indigenous engagement in water management. *Land Use Policy* **49**, 382–393 (2015).

56. Hoogesteger, J. & Verzijl, A. Grassroots scalar politics: Insights from peasant water struggles in the Ecuadorian and Peruvian Andes. *Geoforum* **62**, 13–23 (2015).

57. Radonic, L. Environmental violence, Water rights, and (Un) due process in northwestern Mexico. *Lat. Am. Perspect.* **42**, 27–47 (2015).

58. Turner, S. & Neale, T. First law and the force of water: law, water, entitlement. *Settl. Colon. Stud.* **5**, 387–397 (2015).

59. Chief, K., Meadow, A. & Whyte, K. Engaging southwestern tribes in sustainable water resources topics and management. *Water Switz.* **8**, (2016).

60. Quitian, A. S. & Rodríguez, G. A. Guidelines for inclusion: Ensuring Indigenous peoples’ involvement in water planning processes across South Eastern Australia. *J. Hydrol.* **542**, 828–835 (2016).

61. Von Der Porten, S., De Loë, R. C. & McGregor, D. Incorporating indigenous knowledge systems into collaborative governance for water: Challenges and opportunities. *J. Can. Stud.* **50**, 214–243 (2016).

62. Mena-Vásconez, P., Vincent, L., Vos, J. & Boelens, R. Fighting over water values: diverse framings of flower and food production with communal irrigation in the Ecuadorian Andes. *WATER Int.* **42**, 443–461 (2017).

63. Andrews, E. J., Reed, M. G., Jardine, T. D. & Steelman, T. A. Damming Knowledge Flows: POWER as a Constraint on Knowledge Pluralism in River Flow Decision-making in the Saskatchewan River Delta. *Soc. Nat. Resour.* **31**, 892–907 (2018).

64. Baltutis, W., Moore, M. & Tyler, S. Getting to ecosystem-based function: Exploring the power to influence Columbia River Treaty modernization towards ecosystem considerations. *Int. J. WATER Gov.* **6**, 43–63 (2018).

65. Diver, S., Ahrens, D., Arbit, T. & Bakker, K. Engaging colonial entanglements: “treatment as a state” policy for indigenous water co-governance •. *Glob. Environ. Polit.* **19**, 33–56 (2019).

66. Hoogendam, P. & Boelens, R. Dams and Damages. Conflicting Epistemological Frameworks and Interests Concerning ‘Compensation’ for the Misicuni Project’s Socio-Environmental Impacts in Cochabamba, Bolivia. *WATER* **11**, (2019).

67. Mooney, W. & Cullen, A. Implementing the Aboriginal Waterways Assessment tool: collaborations to engage and empower First Nations in waterway management. *Australas. J. Environ. Manag.* **26**, 197–215 (2019).

68. Norman, E. S. Finding common ground: Negotiating downstream rights to harvest with upstream responsibilities to protect— dairies, berries, and shellfish in the salish sea. *Glob. Environ. Polit.* **19**, 77–97 (2019).

69. Pirsoul, N. & Armoudian, M. Deliberative Democracy and Water Management in New Zealand: a Critical Approach to Collaborative Governance and Co-Management Initiatives. *Water Resour. Manag.* **33**, 4821–4834 (2019).

70. Sarna-Wojcicki, D., Sowerwine, J., Hillman, L., Hillman, L. & Tripp, B. Decentring watersheds and decolonising watershed governance: Towards an ecocultural politics of scale in the Klamath Basin. *Water Altern.* **12**, 241–266 (2019).

71. van Meijl, T. Doing Indigenous Epistemology: Internal Debates about Inside Knowledge in Maori Society. *Curr. Anthropol.* **60**, 155–173 (2019).

72. Alcantara, C., Longboat, S. & Vanhooren, S. Improving First Nations water security through governance. *Can. Public Adm.* **63**, 155–176 (2020).

73. Jordan, P. A. Hands across the water: climate change and binational cooperation in the Great Lakes Basin. *Clim. Change* **161**, 479–497 (2020).

74. Hall, N. L. *et al.* Drinking water delivery in the outer Torres Strait Islands: A case study addressing sustainable water issues in remote Indigenous communities. *Aust. J. Water Resour.* **25**, 80–89 (2021).

75. Hall, N. L., Lee, A., Hoy, W. E. & Creamer, S. Five enablers to deliver safe water and effective sewage treatment to remote Indigenous communities in Australia. *Rural Remote Health* **21**, 1–7 (2021).

76. Howey, K. & Grealy, L. Drinking water security: the neglected dimension of Australian water reform. *Australas. J. WATER Resour.* **25**, 111–120 (2021).

77. Höhl, J., Rodríguez, S., Siemon, J. & Videla, A. Governance of Water in Southern Chile: An Analysis of the Process of Indigenous Consultation as a Part of Environmental Impact Assessment. *Soc. Nat. Resour.* **34**, 743–762 (2021).

78. Moggridge, B. J. & Thompson, R. M. Cultural value of water and western water management: an Australian Indigenous perspective. *Australas. J. Water Resour.* **25**, 4–14 (2021).

79. Strang, V. Envisioning a sustainable future for water. *Aqua Water Infrastruct. Ecosyst. Soc.* **70**, 404–419 (2021).

80. Strube, J. & Thomas, K. A. Damming Rainy Lake and the Ongoing Production of Hydrocolonialism in the US-Canada Boundary Waters. *Water Altern.* **14**, 135–157 (2021).

81. Wilson, N. J., Montoya, T., Arseneault, R. & Curley, A. Governing water insecurity: navigating indigenous water rights and regulatory politics in settler colonial states. *Water Int.* **46**, 783–801 (2021).

82. Acuna, V. & Tironi, M. Extractivist droughts: Indigenous hydrosocial endurance in Quillagua, Chile. *Extr. Ind. Soc.* **9**, (2022).

83. Mora, M. F., Johnston, A. B. D., Watson, M. & Bharadwaj, L. Honouring Water: The Mistawasis Nêhiyawak Water Governance Framework. *Int. Indig. Policy J.* **13**, (2022).

84. Robson-Williams, M., Painter, D. & Kirk, N. From pride and prejudice towards Sense and Sensibility in Canterbury Water Management. *Australas. J. WATER Resour.* **26**, 84–103 (2022).

85. Linton, J. & Pahl-Wostl, C. Drawing from Indigenous ontologies and practices to rethink European water policy. *RIVER Res. Appl.* (2023) doi:10.1002/rra.4126.

86. Macpherson, E. *et al.* Evolving rights to (and of) water in Chile: a case for relationship-based water law and governance. *Int. J. Hum. Rights* (2023) doi:10.1080/13642987.2023.2266719.

87. O’Bryan, K. & Harriden, K. Hear Their Voices: Australia’s First Nations Women and the Legal Recognition of Their Rights to Water. *Aust. Fem. LAW J.* (2023) doi:10.1080/13200968.2023.2253015.

88. O’Donnell, E., Kennedy, M., Garrick, D., Horne, A. & Woods, R. Cultural water and Indigenous water science. *Science* **381**, 619–621 (2023).

89. LIPSETTRIVERA, S. INDIGENOUS COMMUNITIES AND WATER RIGHTS IN COLONIAL PUEBLA - PATTERNS OF RESISTANCE. *AMERICAS* **48**, 463–483 (1992).

90. Barber, M. & Jackson, S. Indigenous engagement in Australian mine water management: The alignment of corporate strategies with national water reform objectives. *Resour. Policy* **37**, 48–58 (2012).

91. C. Thomas, A. Indigenous more-than-humanisms: relational ethics with the Hurunui River in Aotearoa New Zealand. *Soc. Cult. Geogr.* **16**, 974–990 (2015).

92. Womble, B. P. *et al.* Indigenous communities, groundwater opportunities. *Science* **361**, 453–455 (2018).

93. Hemming, S., Rigney, D., Bignall, S., Berg, S. & Rigney, G. Indigenous nation building for environmental futures: Murrundi flows through Ngarrindjeri country. *Australas. J. Environ. Manag.* **26**, 216–235 (2019).

94. Jackson, S. Indigenous Values and Water Resource Management: A Case Study from the Northern Territory. *Australas. J. Environ. Manag.* **12**, 136–146 (2005).

95. Morse, B. W. Indigenous peoples and water rights: Does the united nations’ adoption of the declaration on the rights of Indigenous peoples help? *J. Water Law* **20**, 254–267 (2009).

96. Poirier, R. & Schartmueller, D. Indigenous water rights in Australia. *Soc. Sci. J.* **49**, 317–324 (2012).

97. Trépied, B. Indigenous struggles and water policies in contemporary New Caledonia. *Soc. Identities* **18**, 465–479 (2012).

98. Van den Belt, M., Schiele, H. & Forgie, V. Integrated Freshwater Solutions - A New Zealand Application of Mediated Modeling. *J. Am. Water Resour. Assoc.* **49**, 669–680 (2013).

99. Wilson, N. Indigenous water governance: Insights from the hydrosocial relations of the Koyukon Athabascan village of Ruby, Alaska. *GEOFORUM* **57**, 1–11 (2014).

100. Bischoff-Mattson, Z. & Lynch, A. Integrative Governance of Environmental Water in Australia’s Murray-Darling Basin: Evolving Challenges and Emerging Pathways. *Environ. Manage.* **60**, 41–56 (2017).

101. Black, K. & McBean, E. Indigenous water, Indigenous voice–a national water strategy for Canada’s Indigenous communities. *Can. Water Resour. J.* **42**, 248–257 (2017).

102. Melnychuk, N., Jatel, N. & Warwick Sears, A. L. Integrated water resource management and British Columbia’s Okanagan Basin Water Board. *Int. J. Water Resour. Dev.* **33**, 408–425 (2017).

103. Scott, P., Tayler, B. & Walters, D. Lessons from implementing integrated water resource management: a case study of the North Bay-Mattawa Conservation Authority, Ontario. *Int. J. Water Resour. Dev.* **33**, 393–407 (2017).

104. Ayre, M. L., Wallis, P. J. & Daniell, K. A. Learning from collaborative research on sustainably managing fresh water: Implications for ethical research–practice engagement. *Ecol. Soc.* **23**, (2018).

105. Bischoff-Mattson, Z., Lynch, A. & Joachim, L. Justice, science, or collaboration: divergent perspectives on Indigenous cultural water in Australia’s Murray-Darling Basin. *WATER POLICY* **20**, 235–251 (2018).

106. Kamal, A. G., Dipple, J., Ducharme, S. & Dysart, L. Learning the language of the river: Understanding indigenous water governance with o-pipon-na-piwin Cree nation, northern Manitoba, Canada. *Case Stud. Environ.* **2**, (2018).

107. Latta, A. Indigenous rights and multilevel governance: Learning from the Northwest Territories water stewardship strategy. *Int. Indig. Policy J.* **9**, (2018).

108. Curran, D. Indigenous processes of consent: Repoliticizing water governance through legal pluralism. *Water Switz.* **11**, (2019).

109. Moggridge, B., Betterridge, L. & Thompson, R. Integrating Aboriginal cultural values into water planning: a case study from New South Wales, Australia. *Australas. J. Environ. Manag.* **26**, 273–286 (2019).

110. Godden, L., Jackson, S. & O’Bryan, K. Indigenous water rights and water law reforms in Australia. *Environ. Plan. Law J.* **37**, 655–678 (2020).

111. White, P. A., Bidois, L.-A., Mohi, G. & McGrath, W. Kaitiaki flow and management regime in the spring-fed Awahou Stream, Lake Rotorua. *J. Hydrol. N. Z.* **59**, 63–78 (2020).

112. Viaene, L. Indigenous Water Ontologies, Hydro-Development and the Human/More-Than-Human Right to Water: A Call for Critical Engagement with Plurilegal Water Realities. *WATER* **13**, (2021).

113. Diver, S. *et al.* Indigenous nations at the confluence: water governance networks and system transformation in the Klamath Basin. *Ecol. Soc.* **27**, (2022).

114. Moggridge, B., Thompson, R. & Radoll, P. Indigenous research methodologies in water management: learning from Australia and New Zealand for application on Kamilaroi country. *Wetl. Ecol. Manag.* **30**, 853–868 (2022).

115. Nikolakis, W. & Grafton, R. Law versus justice: the Strategic Aboriginal Water Reserve in the Northern Territory, Australia. *Int. J. WATER Resour. Dev.* **38**, 11–29 (2022).

116. Prieto, M. Indigenous Resurgence, Identity Politics, and the Anticommodification of Nature: The Chilean Water Market and the Atacameno People. *Ann. Am. Assoc. Geogr.* **112**, 487–504 (2022).

117. Young, S., Down, S. & Mascher, S. Indigenous Rights in Freshwater: Mapping the Contested Space in Australia, New Zealand and Canada. *Environ. Plan. LAW J.* **39**, (2023).

118. Back, W. D. & Taylor, J. S. Navajo water rights: pulling the plug on the Colorado River. *Nat. Resour. J.* **20**, 71–90 (1980).

119. Flanagan, C. & Laituri, M. Local cultural knowledge and water resource management: The Wind River Indian Reservation. *Environ. Manage.* **33**, 262–270 (2004).

120. Boelens, R. & Zwarteveen, M. Prices and politics in Andean water reforms. *Dev. CHANGE* **36**, 735–758 (2005).

121. Phelan Hand, J. Protecting the world’s largest body of fresh water: The often overlooked role of Indian Tribes’ co-management of the Great Lakes. *Nat. Resour. J.* **47**, 815–847 (2007).

122. Rea, N. *Provision for Cultural Values in Water Management: The Anmatyerr Story*. (Land and Water Australia, 2008).

123. Baldwin, C., O’Keefe, V. & Hamstead, M. Reclaiming the balance: social and economic assessment - lessons learned after ten years of water reforms in Australia. *Australas. J. Environ. Manag.* **16**, 70–83 (2009).

124. Godden, L. & Gunther, M. Realising capacity: Indigenous involvement in water law and policy reform in south-eastern Australia. *J. Water Law* **20**, 243–253 (2009).

125. Osborn, R. P. Native american winters doctrine and stevens treaty water rights: Recognition, quantification, management. *J. Water Law* **20**, 224–235 (2009).

126. Cranney, K. & Tan, P.-L. Old knowledge in freshwater: Why traditional ecological knowledge is essential for determining environmental flows in water plans. *Australas. J. Nat. Resour. Law Policy* **14**, 71–114 (2011).

127. Hoverman, S. & Ayre, M. Methods and approaches to support Indigenous water planning: An example from the Tiwi Islands, Northern Territory, Australia. *J. Hydrol.* **474**, 47–56 (2012).

128. Jackson, S. E. & Palmer, L. R. Modernising water: Articulating custom in water governance in Australia and East Timor. *Int. Indig. Policy J.* **3**, (2012).

129. Jackson, S., Tan, P.-L., Mooney, C., Hoverman, S. & White, I. Principles and guidelines for good practice in Indigenous engagement in water planning. *J. Hydrol.* **474**, 57–65 (2012).

130. Jackson, S., Pollino, C., Maclean, K., Bark, R. & Moggridge, B. Meeting Indigenous peoples’ objectives in environmental flow assessments: Case studies from an Australian multi-jurisdictional water sharing initiative. *J. Hydrol.* **522**, 141–151 (2015).

131. Jackson, S. & Barber, M. Recognition of indigenous water values in Australia’s Northern Territory: Current progress and ongoing challenges for social justice in water planning. *Plan. Theory Pract.* **14**, 435–454 (2013).

132. Bark, R. H. *et al.* Operationalising the ecosystem services approach in water planning: A case study of indigenous cultural values from the Murray-Darling Basin, Australia. *Int. J. Biodivers. Sci. Ecosyst. Serv. Manag.* **11**, 239–249 (2015).

133. Hart, B., Taylor, M., Iles, M., Kyle, G. & Sinclair, G. Resolving long-term issues related to surface water management and monitoring associated with the Ranger Uranium Mine, Northern Territory, Australia. *Australas. J. Environ. Manag.* **22**, 417–431 (2015).

134. Morrison, A., Bradford, L. & Bharadwaj, L. Quantifiable progress of the First Nations Water Management Strategy, 2001–2013: Ready for regulation? *Can. Water Resour. J.* **40**, 352–372 (2015).

135. Prieto, M. Privatizing Water in the Chilean Andes: The Case of Las Vegas de Chiu-Chiu. *Mt. Res. Dev.* **35**, 220–229 (2015).

136. Berney, P. & Hosking, T. Opportunities and challenges for water-dependent protected area management arising from water management reform in the Murray–Darling Basin: a case study from the Macquarie Marshes in Australia. *Aquat. Conserv. Mar. Freshw. Ecosyst.* **26**, 12–28 (2016).

137. Chambers, R. & Stephens, W. Principles of International Law That Support Claims of Indian Tribes to Water Resources. *UCLA LAW Rev.* **63**, 1530–1563 (2016).

138. O’Bryan, K. MORE AQUA NULLIUS? THE TRADITIONAL OWNER SETTLEMENT ACT 2010 (VIC) AND THE NEGLECT OF INDIGENOUS RIGHTS TO MANAGE INLAND WATER RESOURCES. *Melb. Univ. LAW Rev.* **40**, 547–593 (2016).

139. Schiff, J. S. Masquerading as Compliance: Tracing Canada’s Policy Implementation of the Human Right to Water. *J. Hum. Rights Pract.* **8**, 264–283 (2016).

140. Simms, R., Harris, L., Joe, N. & Bakker, K. Navigating the tensions in collaborative watershed governance: Water governance and Indigenous communities in British Columbia, Canada. *Geoforum* **73**, 6–16 (2016).

141. Patrick, R., Machial, L., Quinney, K. & Quinney, L. Lessons Learned Through Community-Engaged Planning. *Int. Indig. POLICY J.* **8**, (2017).

142. Berry, K. A., Jackson, S., Saito, L. & Forline, L. Reconceptualising water quality governance to incorporate knowledge and values: Case studies from Australian and Brazilian indigenous communities. *Water Altern.* **11**, 40–60 (2018).

143. Cosens, B., McKinney, M., Paisley, R. & Wolf, A. T. Reconciliation of development and ecosystems: the ecology of governance in the International Columbia River Basin. *Reg. Environ. Change* **18**, 1679–1692 (2018).

144. Crow, S. K., Tipa, G. T., Booker, D. J. & Nelson, K. D. Relationships between Maori values and streamflow: tools for incorporating cultural values into freshwater management decisions. *N. Z. J. Mar. Freshw. Res.* **52**, 626–642 (2018).

145. Diver, S. Native Water Protection Flows Through Self-Determination: Understanding Tribal Water Quality Standards and ‘Treatment as a State’. *J. Contemp. WATER Res. Educ.* **163**, 6–30 (2018).

146. Frame, B. New Zealand: New futures, new thinking? *FUTURES* **100**, 45–55 (2018).

147. Hartwig, L. D., Jackson, S. & Osborne, N. Recognition of Barkandji water rights in Australian settler-colonial water regimes. *Resources* **7**, (2018).

148. Kitson, J. C. *et al.* Murihiku Cultural Water Classification System: enduring partnerships between people, disciplines and knowledge systems. *N. Z. J. Mar. Freshw. Res.* **52**, 511–525 (2018).

149. Wilson, N. J. & Inkster, J. Respecting water: Indigenous water governance, ontologies, and the politics of kinship on the ground. *Environ. Plan. E Nat. Space* **1**, 516–538 (2018).

150. Poelina, A., Taylor, K. & Perdrisat, I. Martuwarra Fitzroy River Council: an Indigenous cultural approach to collaborative water governance. *Australas. J. Environ. Manag.* **26**, 236–254 (2019).

151. Marshall, R., Desjardine, M., Levison, J., Anderson, K. & McBean, E. Moving towards effective first nations’ source water protection: Barriers, opportunities, and a framework. *Water Switz.* **12**, 1–25 (2020).

152. Poelina, A., Bagnall, D. & Lim, M. Recognizing the Martuwarra’s First Law Right to Life as a Living Ancestral Being. *Transnatl. Environ. LAW* **9**, 541–568 (2020).

153. Provis, E. Recognising the value of urban runoff and reclaimed water for cultural flows in melbourne: implementation through the planning scheme. *Australas. J. WATER Resour.* **24**, 209–235 (2020).

154. Kelly, S. Mapping hydropower conflicts: A legal geography of dispossession in Mapuche-Williche Territory, Chile. *GEOFORUM* **127**, 269–282 (2021).

155. Lukawiecki, J., Gagnon, R., Dokis, C., Walters, D. & Molot, L. Meaningful engagement with Indigenous peoples: a case study of Ontario’s Great Lakes Protection Act. *Int. J. Water Resour. Dev.* **37**, 603–618 (2021).

156. Lyons, I. & Barber, M. Relatedness and co-existence in water resource assessments: Indigenous water values, rights and interests in the Mitchell catchment, North Queensland. *Aust. J. Water Resour.* **25**, 57–69 (2021).

157. RiverOfLife, M., Taylor, K. S. & Poelina, A. Living Waters, Law First: Nyikina and Mangala water governance in the Kimberley, Western Australia. *Aust. J. Water Resour.* **25**, 40–56 (2021).

158. Taylor, L. *et al.* Nga Puna Aroha: towards an indigenous-centred freshwater allocation framework for Aotearoa New Zealand. *Australas. J. WATER Resour.* **25**, 27–39 (2021).

159. Aleu, R. B., Larsen, R. K. & Methner, N. Participation and marginalization in water governance: probing the agency of powerholders. *Ecol. Soc.* **27**, (2022).

160. Claire, T. & Surprise, K. Moving the Rain: Settler Colonialism, the Capitalist State, and the Hydrologic Rift in California’s Central Valley. *Antipode* **54**, 153–173 (2022).

161. Davis, R. More than a ‘voice’: Indigenous transmission in the Murray-Darling Basin Plan. *J. Environ. Plan. Manag.* (2022) doi:10.1080/09640568.2022.2144165.

162. Mussehl, M. L., Horne, A. C., Webb, J. A. & Poff, N. L. Purposeful Stakeholder Engagement for Improved Environmental Flow Outcomes. *Front. Environ. Sci.* **9**, (2022).

163. O’Donnell, E., Jackson, S., Langton, M. & Godden, L. Racialized water governance: the ‘hydrological frontier’ in the Northern Territory, Australia. *Australas. J. WATER Resour.* **26**, 59–71 (2022).

164. Diver, S., Eitzel, M., Fricke, S. & Hillman, L. Networked Sovereignty: Polycentric Water Governance and Indigenous Self-determination in the Klamath Basin. *WATER Altern.- Interdiscip. J. WATER Polit. Dev.* **15**, 523–550 (2022).

165. Brierley, G. *et al.* Reanimating the strangled rivers of Aotearoa New Zealand. *WILEY Interdiscip. Rev.-WATER* **10**, (2023).

166. Chiblow, S. Reconciling our relationships with the Great Lakes. *J. Gt. Lakes Res.* **49**, S87–S92 (2023).

167. Copeland, N. Politicizing water: Rescaling resistance to extractive development in Guatemala. *Geoforum* **140**, (2023).

168. Sanchez, L., Leonard, B. & Edwards, E. Paper Water, Wet Water, and the Recognition of Indigenous Property Rights. *J. Assoc. Environ. Resour. Econ.* **10**, 1545–1579 (2023).

169. Baijius, W. & Patrick, R. Planning Around Reserves: Probing the Inclusion of First Nations in Saskatchewan’s Watershed Planning Framework. *Int. Indig. POLICY J.* **10**, (2019a).

170. Boelens, R. & Doornbos, B. The battlefield of water rights: Rule making amidst conflicting normative frameworks in the Ecuadorian Highlands. *Hum. Organ.* **60**, 343–355 (2001).

171. Cosens, B. A. The measure of Indian water rights: The Arizona homeland standard, Gila River Adjudication. *Nat. Resour. J.* **42**, 835–872 (2002).

172. Shepherd, H. S. State court jurisdiction over tribal water rights: A call for rational thinking. *J. Environ. Law Litig.* **17**, 343–388 (2002).

173. Statt, G. R. Tapping into Water Rights: An Exploration of Native Entitlement in the Treaty 8 Area of Northern Alberta. *Can. J. Law Soc.* **18**, 103–129 (2003).

174. Bark, R. H. The Arizona Water Settlement Act and urban water supplies. *Irrig. Drain. Syst.* **23**, 79–96 (2009).

175. Lebel, P. M. & Reed, M. G. The capacity of Montreal Lake, Saskatchewan to provide safe drinking water: Applying a framework for analysis. *Can. Water Resour. J.* **35**, 317–338 (2010).

176. Memon, P. & Kirk, N. Role of indigenous Maori people in collaborative water governance in Aotearoa/New Zealand. *J. Environ. Plan. Manag.* **55**, 941–959 (2012).

177. O’Donnell, M. The national water initiative, native title rights to water and the emergent recognition of indigenous specific commercial rights to water in Northern Australia. *Australas. J. Nat. Resour. Law Policy* **16**, 83–100 (2013).

178. O’Donnell, E. Rivers as living beings: rights in law, but no rights to water? *GRIFFITH LAW Rev.* **29**, 643–668 (2020).

179. Rogers, P. & Edmiston, S. The Gila River Indian Community Water Rights Settlement and its impact on water resource management. *WATER Int.* **38**, 250–262 (2013).

180. Markwell, S. The colonial hydropolitics of infrastructure in the Middle Rio Grande Valley. *WILEY Interdiscip. Rev.-WATER* **2**, 425–431 (2015).

181. Robinson, C. J., Bark, R. H., Garrick, D. & Pollino, C. A. Sustaining local values through river basin governance: community-based initiatives in Australia’s Murray–Darling basin. *J. Environ. Plan. Manag.* **58**, 2212–2227 (2015).

182. Collins, L., McGregor, D., Allen, S., Murray, C. & Metcalfe, C. Source water protection planning for Ontario First Nations communities: Case studies identifying challenges and outcomes. *Water Switz.* **9**, (2017).

183. Cuvelier, C. & Greenfield, C. The integrated watershed management planning experience in Manitoba: the local conservation district perspective. *Int. J. Water Resour. Dev.* **33**, 426–440 (2017).

184. McNeeley, S. M. Sustainable climate change adaptation in indian country. *Weather Clim. Soc.* **9**, 393–404 (2017).

185. Arsenault, R., Diver, S., McGregor, D., Witham, A. & Bourassa, C. Shifting the framework of Canadian water governance through Indigenous research methods: Acknowledging the past with an eye on the future. *Water Switz.* **10**, (2018).

186. O’Bryan, K. The changing face of river management in Victoria: The Yarra River Protection (Wilip-gin Birrarung murron) Act 2017 (Vic). *WATER Int.* **44**, 769–785 (2019).

187. Williams, S., Connolly, D. & Williams, A. The recognition of cultural water requirements in the montane rivers of the Snowy Mountains, Australia. *Australas. J. Environ. Manag.* **26**, 255–272 (2019).

188. Fisher, K. & Parsons, M. River co-governance and co-management in aotearoa New Zealand: Enabling indigenous ways of knowing and being. *Transnatl. Environ. Law* **9**, 455–480 (2020).

189. Hania, P. & Graben, S. Stories and the participation of indigenous women in natural resource governance. *Can. J. Women Law* **32**, 310–340 (2020).

190. Hart, B., O’Donnell, E. & Horne, A. Sustainable water resources development in northern Australia: the need for coordination, integration and representation. *Int. J. WATER Resour. Dev.* **36**, 777–799 (2020).

191. Sanchez, L., Edwards, E. & Leonard, B. The economics of indigenous water claim settlements in the American West. *Environ. Res. Lett.* **15**, (2020).

192. Mustafa, D. *et al.* Scalar politics of Indigenous waterscapes in Navajo Nation and Nepal: Conflict, conservation and development. *Environ. Plan. E Nat. Space* (2021) doi:10.1177/25148486211007853.

193. Berry, K. & Cohn, T. Space, Time, and Hydrosocial Imaginaries: Water Quality Governance of the Pyramid Lake Paiute Tribe. *Prof. Geogr.* **75**, 296–304 (2023).

194. Cuadrado-Quesada, G., Lictevout, E., Schmeier, S. & Vargas, C. Revisiting groundwater law through the lenses of earth system law and rights of nature. *WILEY Interdiscip. Rev.-WATER* (2023) doi:10.1002/wat2.1684.

195. Morton, C. & Rutherford, M. The Columbia River Treaty’s adaptive capacity for fish conservation. *Int. Environ. Agreem.-Polit. LAW Econ.* **23**, 43–75 (2023).

196. Tran, T. Valuing water in law: How can indigenous cultural values be reconciled with australia’s water law in order to strengthen indigenous water rights? *J. Water Law* **20**, 144–151 (2009).

197. dan Tarlock, A. Tribal justice and property rights: The evolution of winters V. United States. *Nat. Resour. J.* **50**, 471–499 (2010).

198. Jackson, S. & Langton, M. Trends in the recognition of indigenous water needs in Australian water reform: The limitations of ‘cultural’ entitlements in achieving water equity. *J. Water Law* **22**, 109–123 (2011).

199. Matsui, K. Water ethics for First Nations and biodiversity in Western Canada. *Int. Indig. Policy J.* **3**, (2012).

200. McGregor, D. Traditional knowledge: Considerations for protecting water in Ontario. *Int. Indig. Policy J.* **3**, (2012).

201. McGregor, D. Traditional knowledge and water governance: The ethic of responsibility. *AlterNative* **10**, 493–507 (2014).

202. Concha, L. C. B. The right to water: Understanding its economic, social and cultural components as development factors for indigenous communities. *Sur* **9**, 39–57 (2013).

203. Nakamura, N. Towards a Culturally Sustainable Environmental Impact Assessment: The Protection of Ainu Cultural Heritage in the Saru River Cultural Impact Assessment, Japan. *Geogr. Res.* **51**, 26–36 (2013).

204. von der Porten, S. & de Loë, R. C. Water policy reform and Indigenous governance. *Water Policy* **16**, 222–243 (2013).

205. Strang, V. The Taniwha and the Crown: defending water rights in Aotearoa/New Zealand. *Wiley Interdiscip. Rev. Water* **1**, 121–131 (2014).

206. Bryan, M. VALUING SACRED TRIBAL WATERS WITHIN PRIOR APPROPRIATION. *Nat. Resour. J.* **57**, 139–181 (2017).

207. Radonic, L. Through the aqueduct and the courts: An analysis of the human right to water and indigenous water rights in Northwestern Mexico. *Geoforum* **84**, 151–159 (2017).

208. Jollymore, A., McFarlane, K. & Harris, L. M. Whose input counts? Evaluating the process and outcomes of public consultation through the BC Water Act Modernization. *Crit. Policy Stud.* **12**, 381–405 (2018).

209. Jackson, S. & Nias, D. Watering country: Aboriginal partnerships with environmental water managers of the Murray–Darling Basin, Australia. *Australas. J. Environ. Manag.* **26**, 287–303 (2019).

210. Lopez, R., Hoogendam, P., Vos, J. & Boelens, R. Transforming hydrosocial territories and changing languages of water rights legitimation: Irrigation development in Bolivia’s Pucara watershed. *GEOFORUM* **102**, 202–213 (2019).

211. O’Donnell, E. & Macpherson, E. Voice, power and legitimacy: the role of the legal person in river management in New Zealand, Chile and Australia. *Aust. J. Water Resour.* **23**, 35–44 (2019).

212. Vidal Parra, S. The water rights-based legal mobilization of the wayagainst the Cercado dam: An effective avenue for court-centered lawfare from below? *Antipoda* **2019**, 45–68 (2019).

213. Armoudian, M. & Pirsoul, N. Troubled Waters in New Zealand. *Environ. Commun.- J. Nat. Cult.* **14**, 772–785 (2020).

214. Baltutis, W. & Moore, M. Whose Border? Contested Geographies and Columbia River Treaty Modernization. *J. Borderl. Stud.* **35**, 581–601 (2020).

215. Goff, S. Visionary evaluation: Approaching Aboriginal ontological equity in water management evaluation. *Eval. Program Plann.* **79**, (2020).

216. Macpherson, E. & Salazar, P. Towards a Holistic Environmental Flow Regime in Chile: Providing for Ecosystem Health and Indigenous Rights. *Transnatl. Environ. LAW* **9**, 481–519 (2020).

217. Curley, A. Unsettling Indian Water Settlements: The Little Colorado River, the San Juan River, and Colonial Enclosures. *ANTIPODE* **53**, 705–723 (2021).

218. Kelly, S. & Negroni, J. Tracing institutional surprises in the water-energy nexus: Stalled projects of Chile’s small hydropower boom. *Environ. Plan. E-Nat. SPACE* **4**, 1171–1195 (2021).

219. Cardoso, J. V. & Pacheco-Pizarro, M. R. Water rights, indigenous legal mobilization and the hybridization of legal pluralism in Southern Chile. *Leg. Plur. Crit. Soc. Anal.* **54**, 117–146 (2022).

220. Costanza-Van Den Belt, M., Rao, R., Colloff, M. J., Pittock, J. & Moggridge, B. Watering of wetlands on Indigenous Country in the Murray-Darling Basin, Australia. *Mar. Freshw. Res.* (2022) doi:10.1071/MF22155.

221. Hartwig, L. D., Jackson, S., Markham, F. & Osborne, N. Water colonialism and Indigenous water justice in south-eastern Australia. *Int. J. Water Resour. Dev.* **38**, 30–63 (2022).

222. Woods, R., Woods, I. & Fitzsimons, J. Water and land justice for Indigenous communities in the Lowbidgee Floodplain of the Murray-Darling Basin, Australia. *Int. J. WATER Resour. Dev.* **38**, 64–79 (2022).

1. [↑](#footnote-ref-1)
